# Supplementary material for: Evaluation of Future Climate and Potential Impact on Streamflow in the Upper Nan River Basin of Northern Thailand
Source: Hindawi journal article supplement (doi:10.1155/2020/8881118), 2020-10-24
Supplement: f1 [file 8881118.f1.docx]

**Appendix**

**
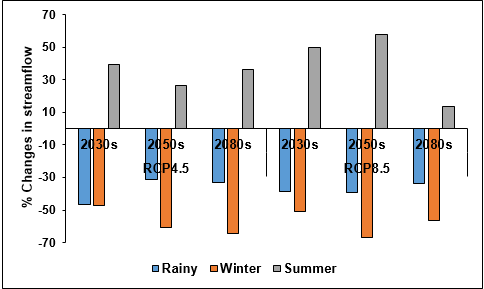
**

Figure A1 Ensemble changes in seasonal flows

**
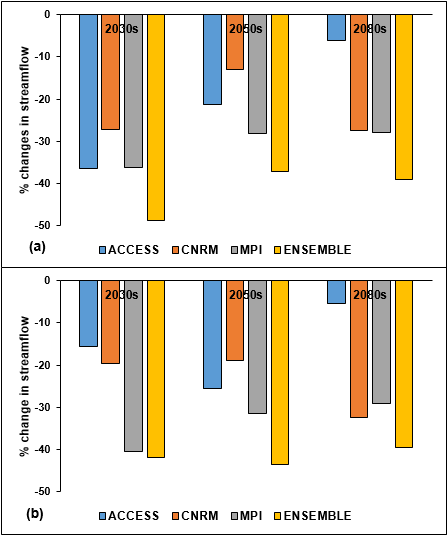
**

Figure A2 Changes in streamflow

**
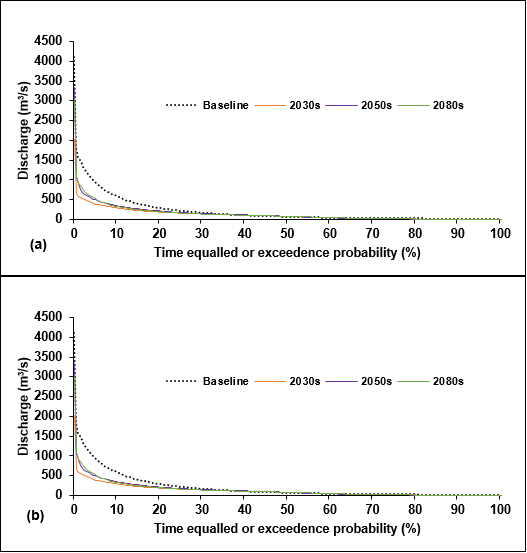
**

Figure A3 FDCs (a) under RCP4.5 and (b) under 8.5

Table A1 Corresponding discharges (in m3/s) for Q5, Q50 and Q95

|  |  | RCP 4.5 | | | RCP 8.5 | | |
| --- | --- | --- | --- | --- | --- | --- | --- |
| Baseline | | 30s | 50s | 80s | 30s | 50s | 80s |
| Q5 | 944 | 389 | 493 | 522 | 440 | 425 | 515 |
| Q50 | 69.8 | 76 | 77 | 80 | 75 | 85 | 80 |
| Q95 | 1.48 | 1.7 | 1.5 | 2 | 1.3 | 1.1 | 1.2 |
